# Supplementary material for: High levels of chromosomal aberrations negatively associate with benefit to checkpoint inhibition in NSCLC
Source: HighWire-hosted journal article supplement (doi:10.1136/jitc-2021-004197), 2022-04-01
Supplement: jitc-2021-004197supp002_data_supplement.xlsx [file jitc-2021-004197supp002_data_supplement.xlsx]

## Sheet: S2
Pt	smoking	histology	sex	age at diagn (years)	PFS (days)	Event (Progression)	ICIs line of therapy	IT_type	SWGS_data	Nanostring_data	Metastasis (CNS)	Metastasis (liver)	Metastasis (bone)
1	yes	adk	male	73.926	1893	0	1	IT	no	yes	no	no	no
2	yes	adk	female	59.0877	167	0	1	IT	yes	no	no	no	no
3	yes	adk	female	53.9616	139	1	1	IT	yes	no	no	no	no
4	no	adk	male	38.4959	915	1	2	IT	no	yes	no	no	no
5	yes	adk	male	58.2493	1391	0	2	IT	yes	no	no	no	no
6	yes	adk	male	57.3699	1912	0	2	IT	no	yes	no	no	no
7	no	adk	male	53.263	55	1	4	TKI+IT	yes	yes	no	yes	no
8	yes	lcnec	male	63.7808	41	1	5	IT	yes	no	no	yes	yes
9	no	adk	male	68.4466	423	1	2	IT	yes	yes	yes	no	no
10	yes	adk	male	61.8411	41	1	3	IT	yes	no	no	no	no
11	yes	adk	female	59.1671	287	1	1	IT	yes	yes	yes	no	no
12	yes	adk	female	36.2603	43	0	6	IT	yes	yes	yes	no	no
13	yes	scc	female	63.3041	256	1	2	QT+IT	yes	no	no	no	no
14	yes	lcnec	male	74.2192	440	1	2	IT	yes	no	no	no	no
15	yes	scc	male	72.8603	36	1	3	IT	yes	yes	no	no	no
16	yes	adk	male	39.726	58	1	2	IT	yes	no	yes	no	no
17	yes	adk	female	61.4603	273	1	1	IT	yes	yes	no	no	yes
18	yes	adk	female	49.8082	49	0	4	TKI+IT	yes	yes	no	no	no
19	yes	adk	female	68.4712	98	1	2	IT	yes	yes	no	no	no
20	yes	scc	male	68.7562	36	1	2	IT	yes	no	no	no	no
21	yes	adk	female	73.8822	381	0	1	QT+IT	yes	no	yes	no	no
22	yes	adk	female	57.4658	344	0	1	IT	yes	yes	no	no	no
23	no	scc	male	60.5479	93	0	3	IT	yes	yes	no	no	no
24	yes	scc	male	55.3562	335	1	3	IT	yes	yes	no	yes	no
25	yes	adk	male	71.4356	693	1	1	QT+IT	yes	no	no	no	no
26	yes	scc	male	77.9973	39	1	2	IT	yes	yes	no	yes	no
27	yes	adk	male	53.8055	172	1	1	IT	yes	yes	no	no	no
28	yes	adk	male	72.2822	37	1	1	IT	yes	no	no	no	yes
29	yes	adk	male	42.3151	112	1	1	TKI+IT	yes	no	yes	no	no
30	yes	adk	male	45.9918	132	1	2	IT	yes	no	yes	yes	no
31	yes	nos	female	56.7315	89	1	2	IT	yes	yes	yes	no	yes
32	yes	adk	male	55.0411	506	0	1	QT+IT	yes	yes	no	no	no
33	yes	scc	male	59.4493	41	1	3	IT	yes	no	no	yes	yes
34	yes	adk	male	64.5479	406	1	1	IT	yes	yes	no	yes	yes
35	yes	adk	female	56.4603	127	0	2	IT	yes	yes	no	no	no
36	yes	adk	male	64.0877	128	1	2	IT	yes	yes	no	yes	yes
37	yes	nos	male	69.3507	166	1	2	IT	yes	yes	no	yes	no
38	yes	scc	female	51.6795	40	1	2	IT	yes	yes	no	yes	no
39	yes	scc	female	67.3096	42	1	1	IT	yes	yes	yes	no	no
40	yes	adk	male	75.2548	337	0	2	IT	yes	no	no	no	no
41	yes	adk	male	66.2822	363	1	2	IT	yes	no	no	no	no
42	yes	nos	male	69.5233	41	1	1	IT	yes	no	no	yes	no
43	yes	adk	female	49.0932	18	1	1	IT	yes	no	no	no	yes
44	yes	adk	female	60.5123	1131	0	1	QT+IT	yes	yes	yes	no	no
45	yes	adk	male	53.6493	126	1	1	QT+IT	yes	no	no	yes	no
46	yes	adk	male	50.3562	699	0	1	IT	yes	no	yes	no	no
47	yes	adk	female	49.4904	1801	0	2	IT	yes	no	yes	yes	no
48	yes	adk	male	76.0849	49	1	2	IT	yes	no	yes	yes	no
49	yes	adk	female	56.0849	714	0	3	IT	yes	yes	no	no	no
50	yes	adk	male	70.8822	40	1	2	IT	yes	yes	no	no	no
51	no	adk	female	57.1041	656	0	1	IT	yes	no	no	no	no
52	no	adk	male	33.989	559	0	1	QT+IT	yes	no	no	no	no
53	yes	adk	female	56.7041	251	0	2	IT	yes	yes	yes	no	no
54	yes	adk	male	33.6356	62	1	2	IT	yes	no	yes	yes	yes
55	yes	adk	female	63.2603	230	1	1	QT+IT	yes	yes	no	no	no
56	no	scc	male	79.8986	504	1	1	IT	yes	no	yes	yes	no
57	yes	adk	male	68.7068	64	1	2	IT	yes	yes	no	yes	yes
58	yes	scc	male	61.8548	1070	0	1	IT	yes	yes	no	yes	no
59	yes	nos	male	55.3589	83	1	4	TKI+IT	yes	yes	no	no	yes
60	yes	adk	female	53.411	534	1	1	IT	yes	yes	no	no	yes
61	yes	adk	female	54.7562	558	0	1	IT	yes	yes	no	no	no
62	yes	nos	male	73.2712	125	1	2	IT	yes	yes	no	no	no
63	yes	adk	female	51.0658	98	1	2	IT	yes	no	no	no	yes
64	yes	adk	male	48.6329	155	1	1	TKI+IT	yes	no	no	no	no
65	yes	adk	female	59.4767	175	1	2	QT+IT	yes	yes	no	no	yes
66	yes	adk	male	63.5205	286	1	1	IT	yes	no	no	no	yes
67	yes	nos	male	73.0959	463	1	1	QT+IT	yes	no	no	yes	no
68	yes	adk	male	65.1863	42	1	2	IT	yes	no	no	no	no
69	yes	adk	male	65.5014	41	1	2	IT	yes	yes	no	no	no
70	yes	lcnec	male	56.663	62	1	4	IT	yes	no	no	yes	yes
71	yes	adk	male	48.0877	1070	0	2	IT	yes	yes	no	no	no
72	yes	adk	female	60.7808	5	0	3	IT	yes	yes	no	no	no
73	yes	adk	male	56.2247	197	1	2	IT	yes	no	no	no	no
74	yes	adk	female	55.2247	349	1	1	IT	yes	yes	yes	no	no
75	no	adk	male	64.874	68	1	2	IT	yes	no	no	no	no
76	yes	scc	male	53.8247	1977	0	2	IT	yes	no	no	no	no
77	yes	scc	male	45.5452	84	1	2	IT	yes	yes	no	yes	no
78	yes	adk	male	42.0849	1096	0	2	IT	yes	no	yes	yes	yes
79	yes	scc	male	45.063	55	1	2	IT	yes	yes	yes	no	yes
80	yes	adk	female	70.6	27	1	1	IT	yes	no	no	no	no
81	yes	adk	female	61.0658	54	1	2	IT	yes	no	yes	no	yes
82	yes	scc	male	52.3452	144	1	1	IT	no	yes	no	no	no
83	yes	scc	male	67.8301	19	1	1	IT	yes	yes	no	no	no
84	no	adk	female	66.9973	162	1	1	IT	yes	no	yes	no	yes
85	yes	adk	male	66.9671	0	1	4	IT	yes	yes	yes	yes	yes
86	yes	scc	male	72.2603	212	1	1	IT	no	yes	no	no	no
87	yes	scc	male	57.1918	167	0	2	IT	no	yes	no	no	no
88	yes	scc	male	73.9452	997	1	2	IT	no	yes	no	no	no
89	yes	lcnec	female	47.6548	35	1	2	IT	no	yes	yes	no	no
90	yes	scc	male	58.2	125	1	3	IT	no	yes	no	no	no
91	yes	adk	female	58.5589	48	1	4	IT	no	yes	no	yes	no
92	no	adk	male	83.3205	84	1	2	IT	yes	yes	no	yes	yes
93	yes	adk	male	68.4904	162	1	2	IT	no	yes	yes	no	no
94	yes	adk	male	57.6521	41	1	2	IT	yes	no	no	no	no
95	yes	adk	male	57.7425	2205	0	2	IT	no	yes	yes	yes	no
96	yes	scc	male	54.4658	83	1	2	IT	no	yes	no	no	yes
97	yes	adk	male	51.5315	259	1	2	IT	yes	no	yes	yes	yes
98	yes	adk	female	64.7233			1	IT	no	yes	no	no	no
99	yes	scc	male	68.7479	51	1	1	IT	no	yes	no	no	yes
100	yes	adk	male	74.2082	147	0	1	QT+IT	no	yes	no	no	no
101	yes	adk	female	56.411	1879	0	5	IT	yes	yes	no	yes	no
102	yes	adk	male	42.189	114	1	2	IT	no	yes	no	no	no
103	yes	adk	female	68.0219	132	1	1	IT	yes	no	no	no	no
104	no	adk	female	46.3068	228	1	2	IT	no	yes	no	no	no
105	yes	adk	male	51.2685	215	1	2	IT	no	yes	no	yes	no
106	no	adk	female	50.6438	81	1	2	IT	yes	no	no	no	yes
107	yes	adk	male	52.0219	56	1	3	IT	yes	no	no	yes	yes
108	no	adk	male	63.7425	14	0	3	IT	no	yes	no	no	yes
109	yes	adk	female	73.7699	1176	0	1	IT	yes	no	no	yes	yes
