# Supplementary material for: High levels of chromosomal aberrations negatively associate with benefit to checkpoint inhibition in NSCLC
Source: HighWire-hosted journal article supplement (doi:10.1136/jitc-2021-004197), 2022-04-01
Supplement: jitc-2021-004197supp003_data_supplement.xlsx [file jitc-2021-004197supp003_data_supplement.xlsx]

## Sheet: Hoja1
Groups	p-value	Q-value
A vs B	0.004075	0.030565
A vs C	0.443862	0.554828
A vs D	0.639577	0.685261
A vs E	0.047678	0.178791
A vs F	0.162816	0.348890
B vs C	0.200468	0.375878
B vs D	0.064098	0.192293
B vs E	0.000022	0.000323
B vs F	0.352043	0.528064
C vs D	0.902378	0.902378
C vs E	0.234318	0.390530
C vs F	0.507554	0.585639
D vs E	0.105603	0.264008
D vs F	0.438514	0.554828
E vs F	0.020867	0.104335
