# Supplementary material for: High levels of chromosomal aberrations negatively associate with benefit to checkpoint inhibition in NSCLC
Source: HighWire-hosted journal article supplement (doi:10.1136/jitc-2021-004197), 2022-04-01
Supplement: jitc-2021-004197supp005_data_supplement.xlsx [file jitc-2021-004197supp005_data_supplement.xlsx]

## Sheet: multivariate_nosite
Covariate	Hazard ratio	Hazard ratio lower 95%	Hazard ratio upper 95%	p-value	-log2(p)
FGAa+c	1.92788	1.33884	2.77609	0.000417907	11.2245
Sex (female)	0.618683	0.303576	1.26087	0.186223	2.4249
Smoking (yes)	2.07889	0.531836	8.12616	0.292723	1.77239
Histology (ADK)	0.980557	0.255191	3.76774	0.977193	0.0332848
Histology (SCC)	1.29894	0.292784	5.76273	0.730794	0.452464
Histology (NOS)	0.700873	0.155437	3.16027	0.643693	0.635554
Metastasis (liver)	0.960706	0.483505	1.90889	0.908896	0.137813
Metastasis (bone)	2.33359	1.2026	4.52823	0.0122315	6.35325
Metastasis (CNS)	0.876771	0.39532	1.94457	0.74625	0.422268
Line ICIs (2nd)	1.39452	0.72554	2.68031	0.318501	1.65063
Line ICIs (>=3)	1.78052	0.628668	5.04281	0.277426	1.84983
Age at diagnosis	1.48689	1.01379	2.18077	0.04235	4.56149
Biopsy to ICIs start (days)	0.826035	0.628415	1.0858	0.170714	2.55035
