# Supplementary material for: High levels of chromosomal aberrations negatively associate with benefit to checkpoint inhibition in NSCLC
Source: HighWire-hosted journal article supplement (doi:10.1136/jitc-2021-004197), 2022-04-01
Supplement: jitc-2021-004197supp006_data_supplement.xlsx [file jitc-2021-004197supp006_data_supplement.xlsx]

## Sheet: multivariate_site
Covariate	Hazard ratio	Hazard ratio lower 95%	Hazard ratio upper 95%	p-value	-log2(p)
FGAa+c	2.2148	1.52204	3.22287	3.2565e-05	14.9063
Sex (female)	0.667693	0.316692	1.40772	0.288517	1.79327
Smoking (yes)	1.5713	0.383265	6.44196	0.530169	0.915477
Histology (ADK)	1.41061	0.34602	5.75055	0.631363	0.663458
Histology (SCC)	2.31857	0.521762	10.3031	0.269121	1.89367
Histology (NOS)	1.02807	0.231508	4.56541	0.970967	0.0425059
Metastasis (liver)	1.19803	0.558041	2.57197	0.643002	0.637106
Metastasis (bone)	2.45519	1.24063	4.85878	0.00990613	6.65746
Metastasis (CNS)	1.0911	0.474892	2.50688	0.837244	0.25628
Line ICIs (2nd)	1.64639	0.827253	3.27662	0.155641	2.68371
Line ICIs (>=3)	2.24975	0.761609	6.64562	0.142324	2.81275
Age at diagnosis	1.39839	0.93017	2.10231	0.106967	3.22477
Biopsy to ICIs start (days)	0.740755	0.553921	0.990606	0.0430099	4.53919
Sample site (lung)	2.79056	1.37686	5.65578	0.0044098	7.82507
